# Supplementary material for: Air sampling accurately captures circulating zoonotic viral diversity emerging from poultry live-animal markets
Source: Research Square preprint supplement (doi:10.21203/rs.3.rs-5682962/v1), 2025-02-13
Supplement: Supplementary file 1 [file 3124b06ee8481900e177b869.xlsx]

## Sheet: Supplementary Table 1
Supplementary Table 1: Pairwise PERMANOVA to determine statistically significant differences in virome compositon between sample types
	pairs	Df	SumsOfSqs	F.Model	R2	p.value	p.adjusted	sig
1	Chicken_Throat vs Air_Outside	1	0.966278	4.30314	0.157606	0.001	0.0015	*
2	Chicken_Throat vs Duck_Cloacal	1	1.39424	5.15236	0.155415	0.001	0.0015	*
3	Chicken_Throat vs Environmental_Wash_Water	1	0.616242	2.40791	0.0743001	0.003	0.00409091	*
4	Chicken_Throat vs Environmental_Drinking_Water	1	0.361578	1.49025	0.0634411	0.107	0.114643
5	Chicken_Throat vs Environmental_Cage	1	0.953583	4.16412	0.121886	0.001	0.0015	*
6	Chicken_Throat vs Air_Slaughter_Area	1	1.0674	4.49064	0.142602	0.001	0.0015	*
7	Chicken_Throat vs Air_Holding_Area	1	1.00341	4.86664	0.162946	0.001	0.0015	*
8	Chicken_Throat vs Duck_Throat	1	1.28933	5.29219	0.163884	0.001	0.0015	*
9	Chicken_Throat vs Chicken_Cloacal	1	0.809222	3.29302	0.105232	0.001	0.0015	*
10	Air_Outside vs Duck_Cloacal	1	1.46082	5.72625	0.199339	0.001	0.0015	*
11	Air_Outside vs Environmental_Wash_Water	1	1.2267	5.13833	0.170492	0.001	0.0015	*
12	Air_Outside vs Environmental_Drinking_Water	1	0.469563	2.19997	0.114582	0.006	0.0072973	*
13	Air_Outside vs Environmental_Cage	1	0.52189	2.52822	0.0918411	0.004	0.00529412	*
14	Air_Outside vs Air_Slaughter_Area	1	0.700387	3.27258	0.129491	0.002	0.0028125	*
15	Air_Outside vs Air_Holding_Area	1	0.611087	3.54747	0.150652	0.002	0.0028125	*
16	Air_Outside vs Duck_Throat	1	1.79937	8.13082	0.269851	0.001	0.0015	*
17	Air_Outside vs Chicken_Cloacal	1	0.994138	4.42153	0.161243	0.001	0.0015	*
18	Duck_Cloacal vs Environmental_Wash_Water	1	0.731785	2.61959	0.0803072	0.001	0.0015	*
19	Duck_Cloacal vs Environmental_Drinking_Water	1	0.923598	3.36373	0.13262	0.001	0.0015	*
20	Duck_Cloacal vs Environmental_Cage	1	1.42716	5.65376	0.158574	0.001	0.0015	*
21	Duck_Cloacal vs Air_Slaughter_Area	1	1.42516	5.40398	0.166769	0.001	0.0015	*
22	Duck_Cloacal vs Air_Holding_Area	1	1.67205	7.13654	0.222069	0.001	0.0015	*
23	Duck_Cloacal vs Duck_Throat	1	0.538812	1.99812	0.0689051	0.006	0.0072973	*
24	Duck_Cloacal vs Chicken_Cloacal	1	1.53545	5.66925	0.168381	0.001	0.0015	*
25	Environmental_Wash_Water vs Environmental_Drinking_Water	1	0.496247	1.93924	0.074761	0.023	0.0265385	.
26	Environmental_Wash_Water vs Environmental_Cage	1	1.0878	4.53623	0.124157	0.001	0.0015	*
27	Environmental_Wash_Water vs Air_Slaughter_Area	1	1.31769	5.29164	0.154313	0.001	0.0015	*
28	Environmental_Wash_Water vs Air_Holding_Area	1	1.37533	6.23239	0.18754	0.001	0.0015	*
29	Environmental_Wash_Water vs Duck_Throat	1	0.867996	3.41005	0.105216	0.001	0.0015	*
30	Environmental_Wash_Water vs Chicken_Cloacal	1	1.08327	4.22912	0.123553	0.001	0.0015	*
31	Environmental_Drinking_Water vs Environmental_Cage	1	0.261172	1.17517	0.0466798	0.278	0.284318
32	Environmental_Drinking_Water vs Air_Slaughter_Area	1	0.506252	2.17787	0.0939632	0.006	0.0072973	*
33	Environmental_Drinking_Water vs Air_Holding_Area	1	0.411238	2.15941	0.102055	0.011	0.0130263	.
34	Environmental_Drinking_Water vs Duck_Throat	1	1.21042	5.04163	0.193599	0.001	0.0015	*
35	Environmental_Drinking_Water vs Chicken_Cloacal	1	0.391654	1.6122	0.0682783	0.056	0.062561
36	Environmental_Cage vs Air_Slaughter_Area	1	0.365473	1.65252	0.0539115	0.057	0.062561
37	Environmental_Cage vs Air_Holding_Area	1	0.238942	1.25258	0.0443352	0.214	0.223953
38	Environmental_Cage vs Duck_Throat	1	1.78457	7.87238	0.213503	0.001	0.0015	*
39	Environmental_Cage vs Chicken_Cloacal	1	0.545672	2.38055	0.073518	0.001	0.0015	*
40	Air_Slaughter_Area vs Air_Holding_Area	1	0.13616	0.695549	0.0281649	0.817	0.817
41	Air_Slaughter_Area vs Duck_Throat	1	1.80938	7.6848	0.228139	0.001	0.0015	*
42	Air_Slaughter_Area vs Chicken_Cloacal	1	0.817565	3.43603	0.112893	0.001	0.0015	*
43	Air_Holding_Area vs Duck_Throat	1	1.99802	9.86982	0.291404	0.001	0.0015	*
44	Air_Holding_Area vs Chicken_Cloacal	1	0.694708	3.36506	0.118634	0.001	0.0015	*
45	Duck_Throat vs Chicken_Cloacal	1	1.87839	7.70226	0.221953	0.001	0.0015	*

## Sheet: Supplementary Table 2
	Supplementary Table 2: P values calculated when comparing the percentage viral contigs in chicken throat swabs that map to ES
		Air_Slaughter_Area	Air_Holding_Area	Air_Outside	Environmental_Wash_Water	Environmental_Drinking_Water
	Air_Holding_Area	0.789953
	Air_Outside	0.161188	0.130697
	Environmental_Wash_Water	0.00834806	0.00834806	0.467634
	Environmental_Drinking_Water	0.303156	0.26184	0.730983	0.303156
	Environmental_Cage	0.530728	0.467634	0.303156	0.0398902	0.505166

## Sheet: Supplementary Table 3
	Supplementary Table 3: P values calculated when comparing the percentage viral contigs in chicken cloacal swabs that map to ES
		Air_Slaughter_Area	Air_Holding_Area	Air_Outside	Environmental_Wash_Water	Environmental_Drinking_Water
	Air_Holding_Area	0.73896
	Air_Outside	0.597815	0.434944
	Environmental_Wash_Water	0.00790169	0.00505818	0.160481
	Environmental_Drinking_Water	0.620395	0.513182	0.890202	0.160481
	Environmental_Cage	0.73896	0.620395	0.682171	0.0123606	0.73896

## Sheet: Supplementary Table 4
	Supplementary Table 4: P values calculated when comparing the percentage viral contigs in duck throat swabs that map to ES
		Air_Slaughter_Area	Air_Holding_Area	Air_Outside	Environmental_Wash_Water	Environmental_Drinking_Water
	Air_Holding_Area	0.916633
	Air_Outside	0.132613	0.132613
	Environmental_Wash_Water	0.175275	0.231478	0.592763
	Environmental_Drinking_Water	0.355531	0.420885	0.444131	0.824094
	Environmental_Cage	0.235381	0.311893	0.444131	0.824094	0.916633

## Sheet: Supplementary Table 5
	Supplementary Table 5: P values calculated when comparing the percentage viral contigs in duck cloacal swabs that map to ES
		Air_Slaughter_Area	Air_Holding_Area	Air_Outside	Environmental_Wash_Water	Environmental_Drinking_Water
	Air_Holding_Area	0.96634
	Air_Outside	0.131713	0.131713
	Environmental_Wash_Water	0.240032	0.241891	0.57589
	Environmental_Drinking_Water	0.376755	0.376755	0.43977	0.798672
	Environmental_Cage	0.376755	0.376755	0.376755	0.653547	0.955722
